# Supplementary material for: Structural complexity governs seagrass acclimatization to depth with relevant consequences for meadow production, macrophyte diversity and habitat carbon storage capacity
Source: PubMed Central journal article supplement (PMC6787196; doi:10.1038/s41598-019-51248-z), 2019-10-10
Supplement: 41598_2019_51248_MOESM2_ESM.pdf [file 41598_2019_51248_MOESM2_ESM.pdf]

# Structural complexity governs seagrass acclimatization to depth with relevant consequences for meadow production, macrophyte diversity and habitat carbon storage capacity

Susana Enríquez, Irene Olivé, Napo Cayabyab, and John D. Hedley

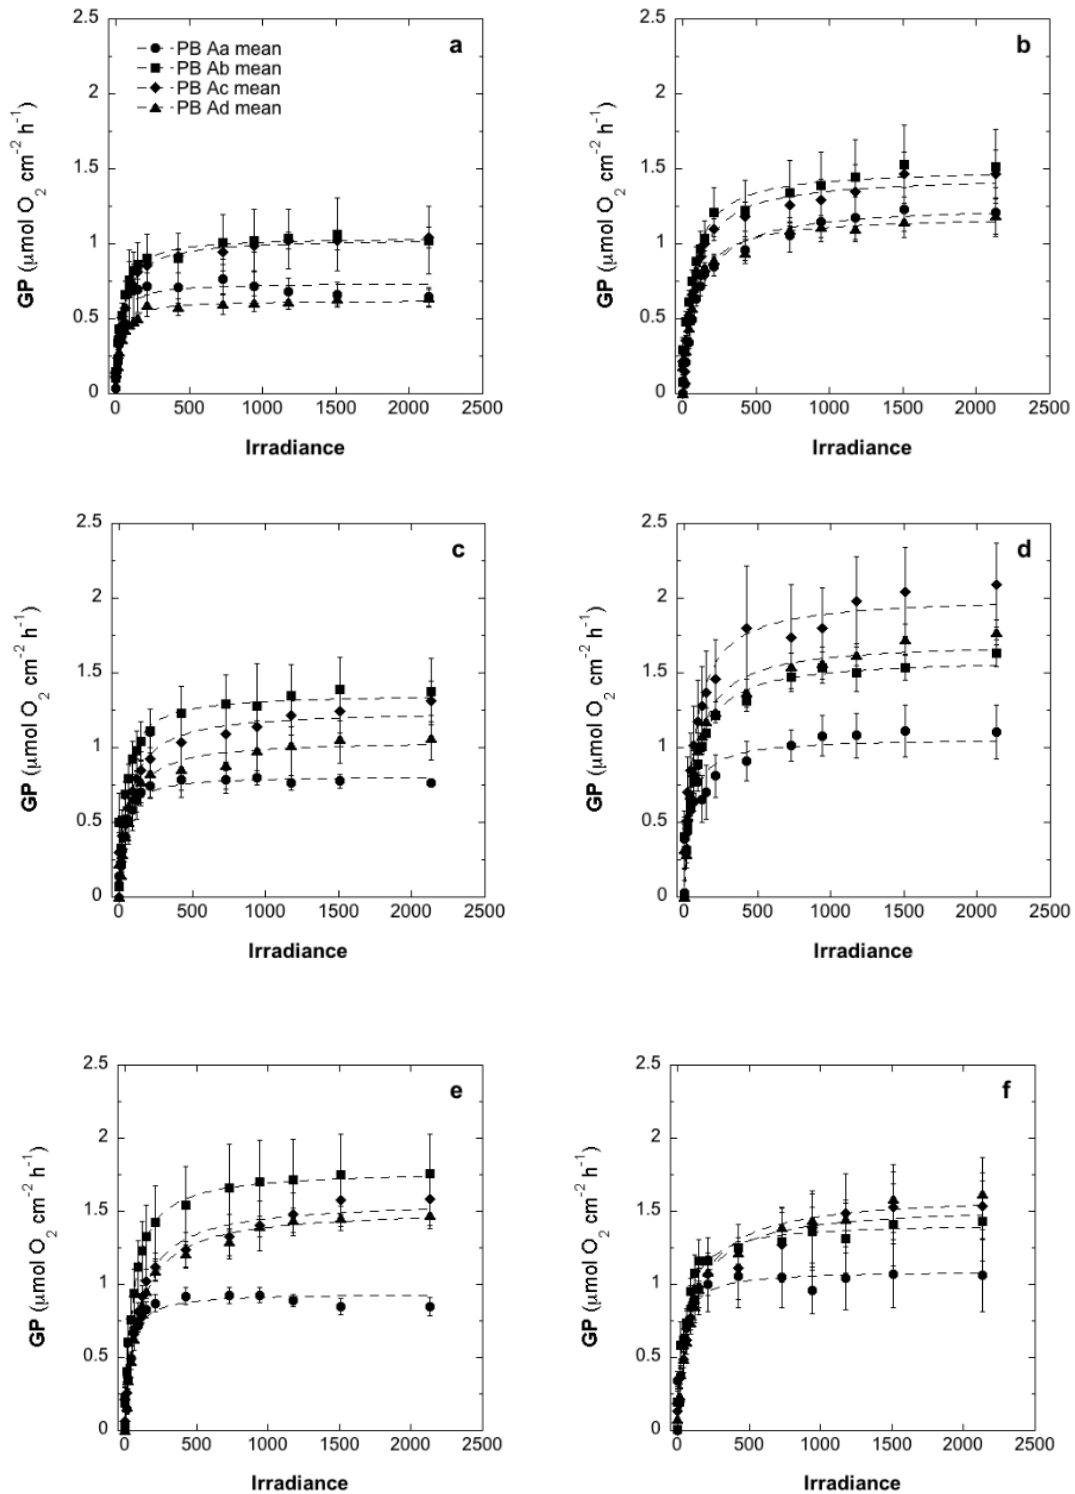

**Figure S1:** Photosynthesis vs. Irradiance curves (P vs E) for four leaf segments (a-d) located at different positions within the seagrass canopy, from a-apical (circle) to d-basal leaf segment (triangle). Each plot (a-f) corresponds to the same site label (A-F) located along a continuous seagrass meadow, from the shallowest (A) to the deepest (F).
